# Supplementary material
Source: PubMed Central journal article supplement (PMC3243101)

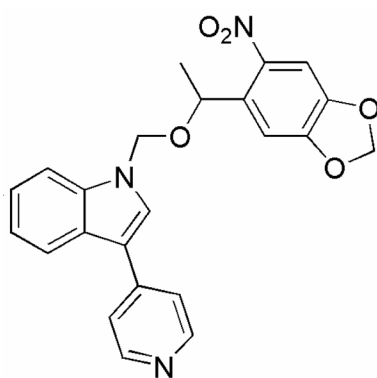

Supplement: supp_dev.072165_DEV072165FigS1.pdf [file supp_dev.072165_DEV072165FigS1.pdf]

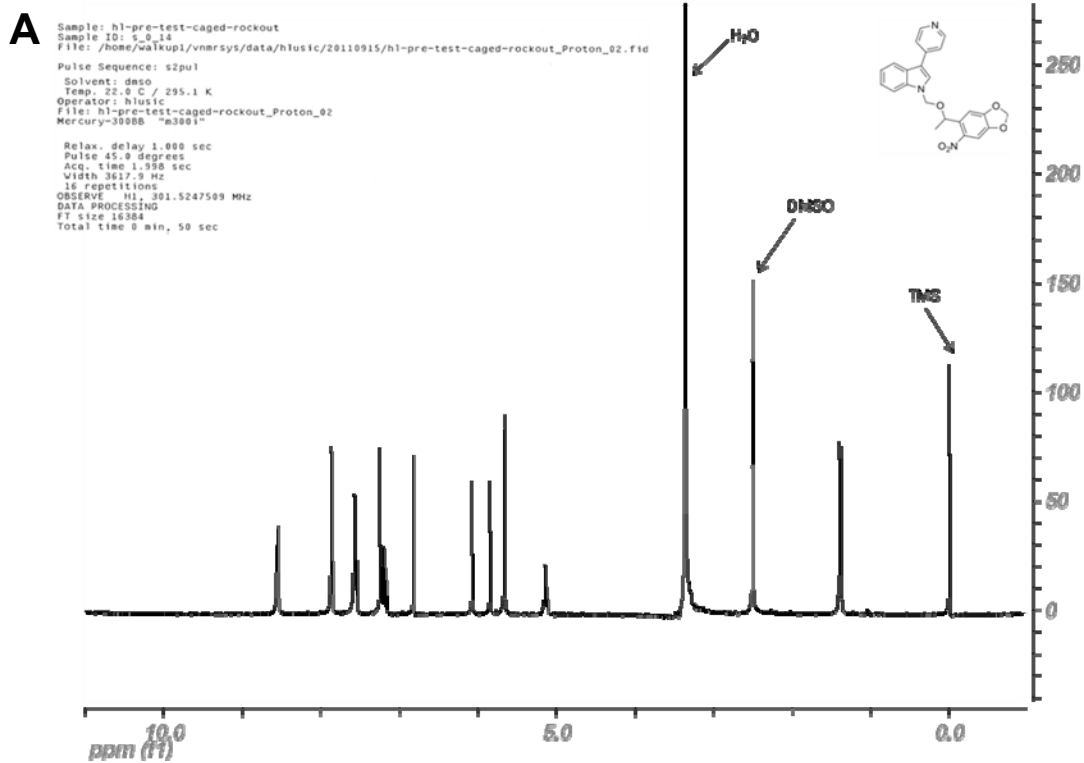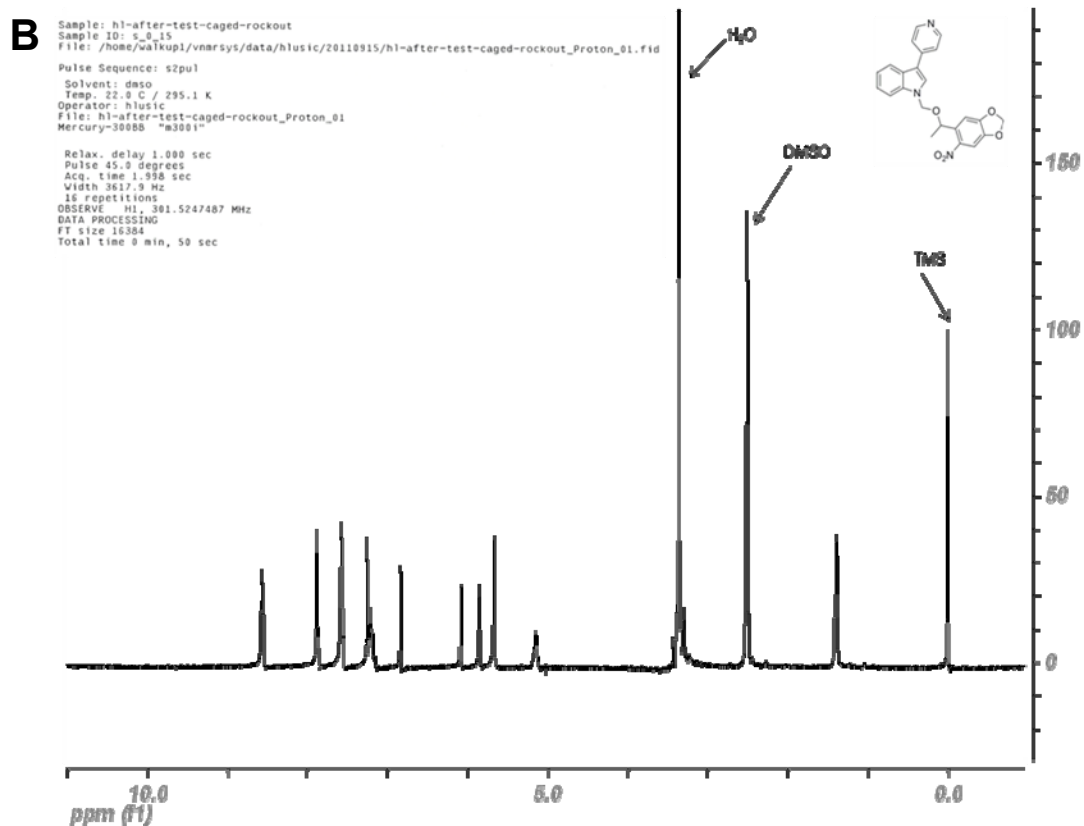

Supplement: supp_dev.072165_DEV072165FigS2.pdf [file supp_dev.072165_DEV072165FigS2.pdf]

**cRO (before UV irradiation)**

**A**

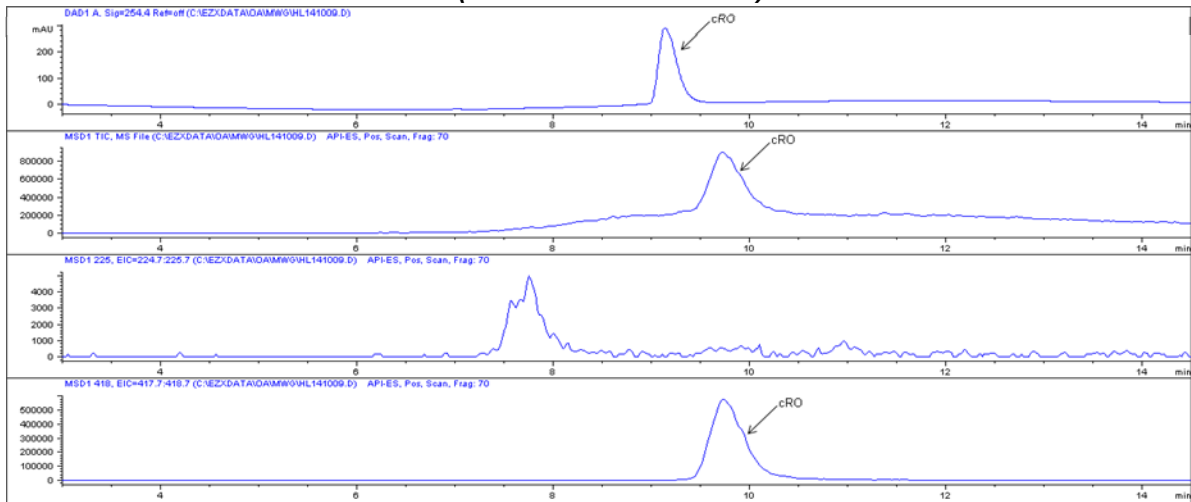

**cRO (after UV irradiation)**

**B**

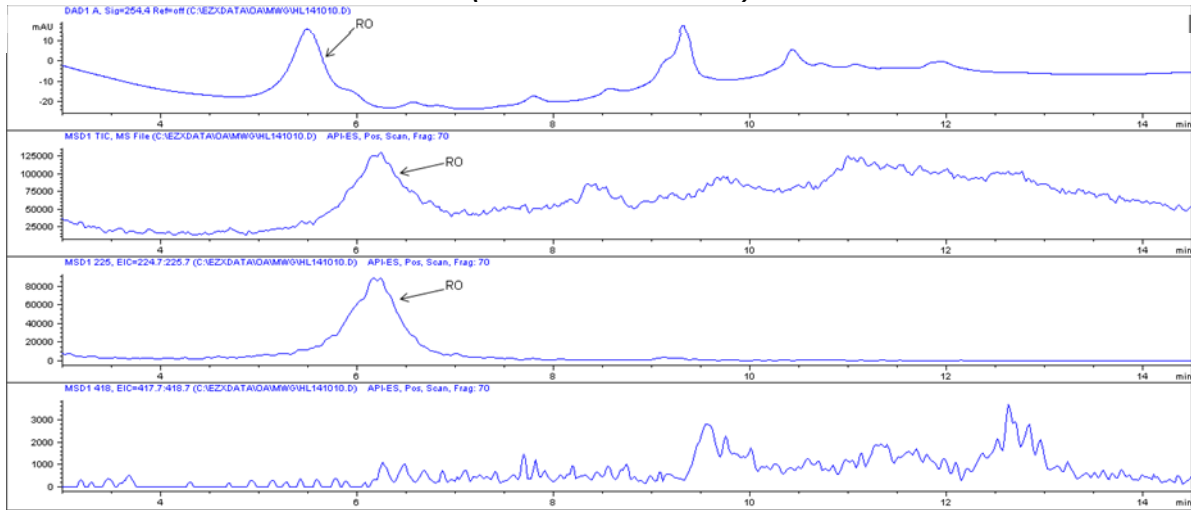

**Non-caged RO (standard)**

**C**

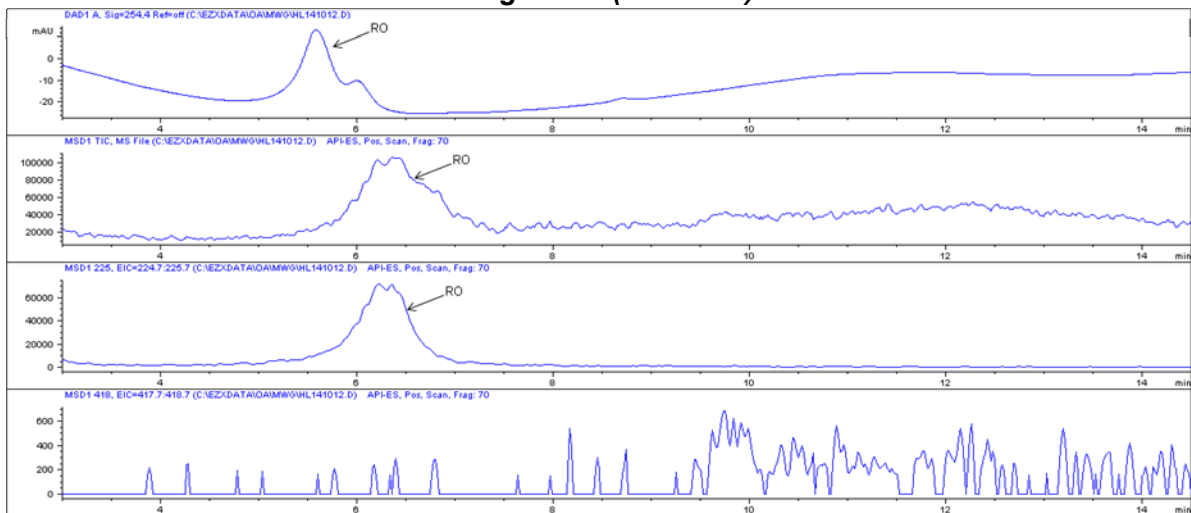

Supplement: supp_dev.072165_DEV072165FigS3.pdf [file supp_dev.072165_DEV072165FigS3.pdf]

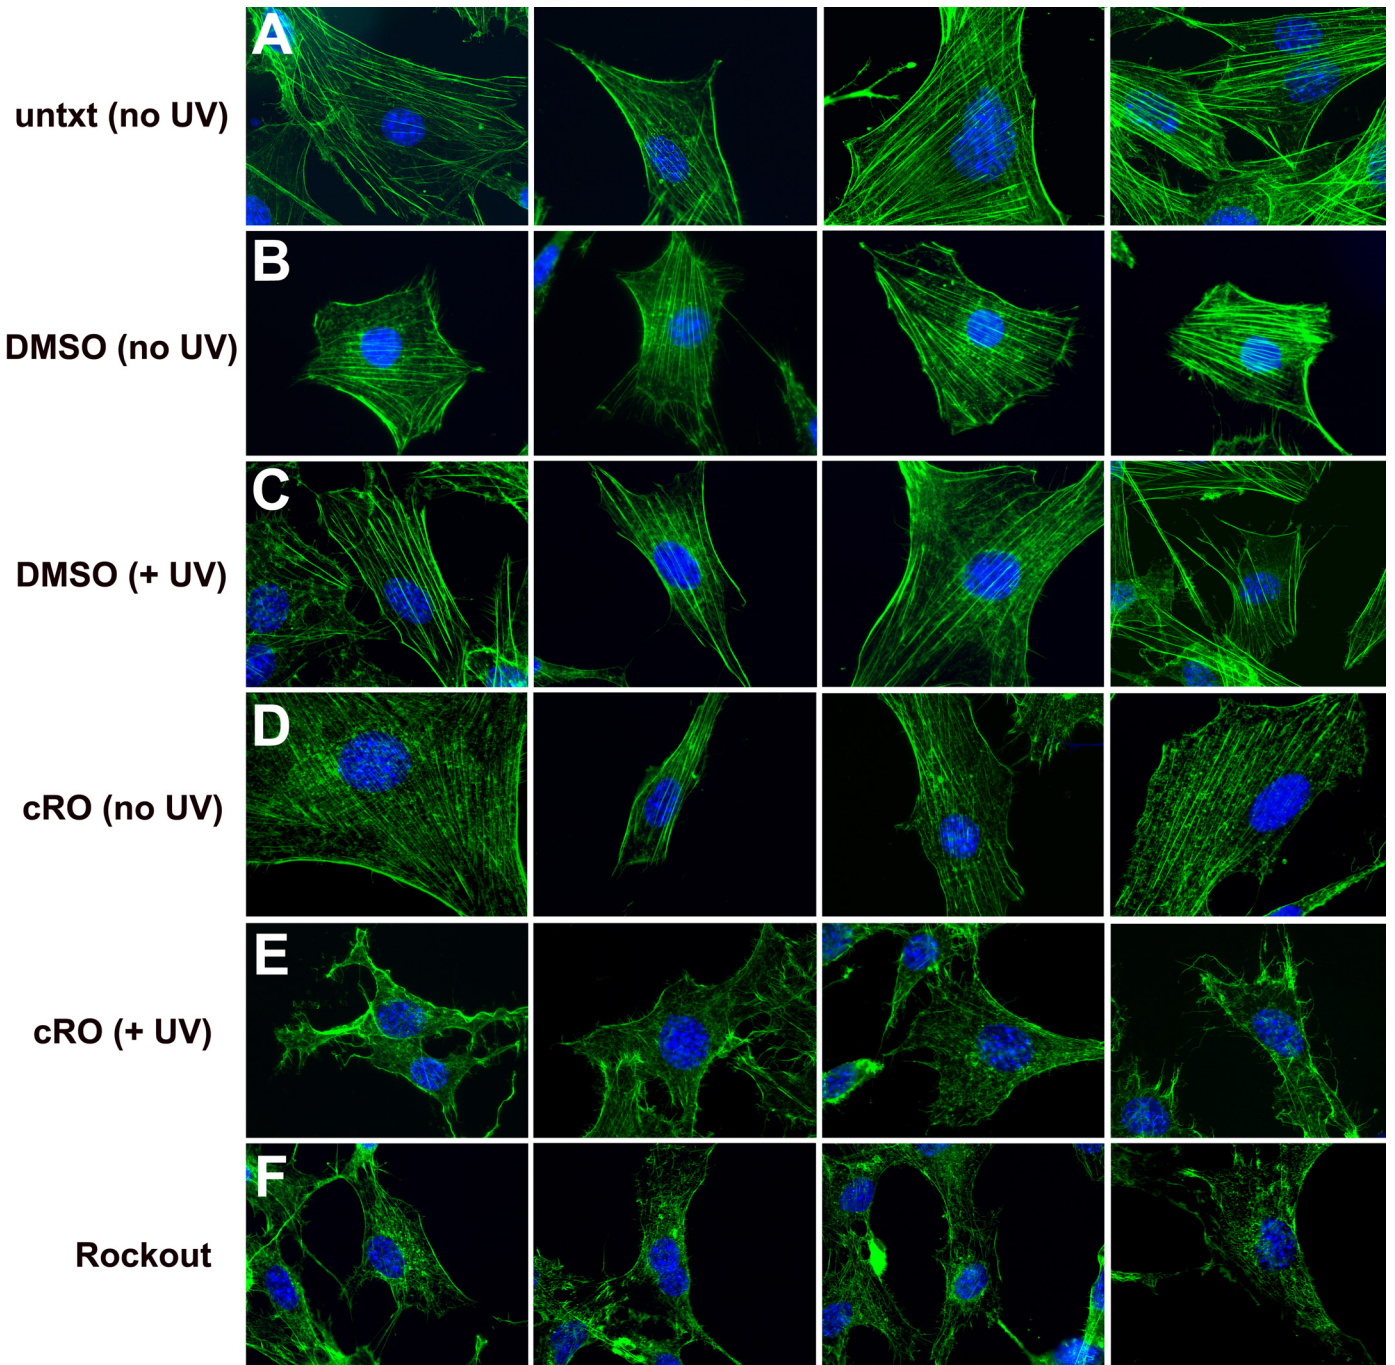

Supplement: supp_dev.072165_DEV072165FigS4.pdf [file supp_dev.072165_DEV072165FigS4.pdf]

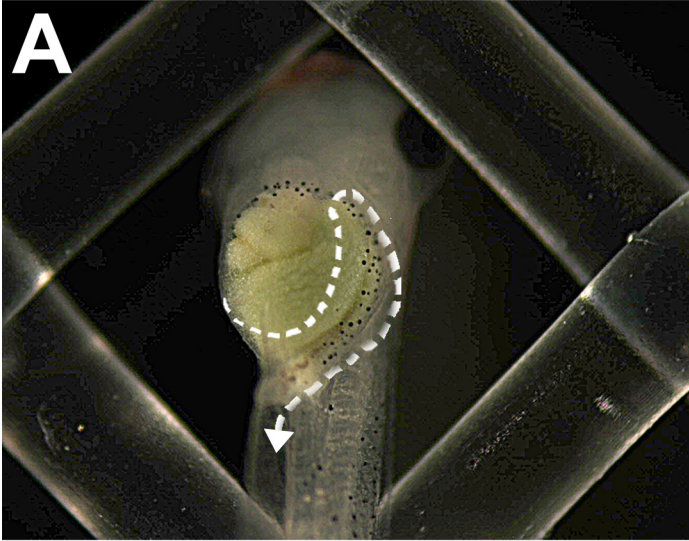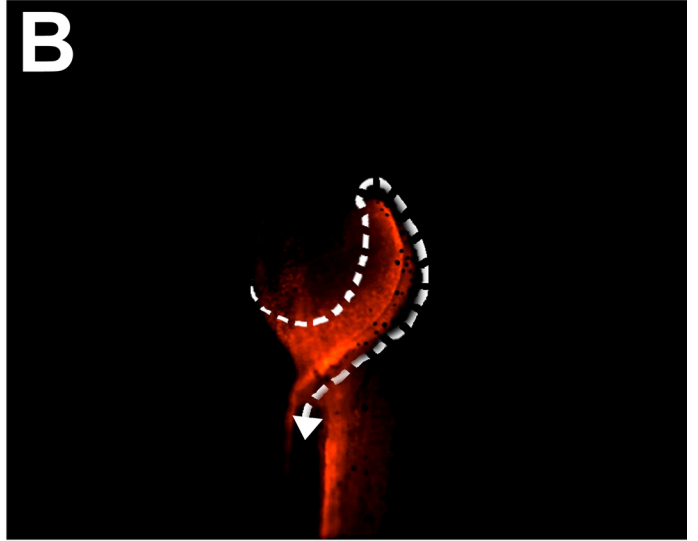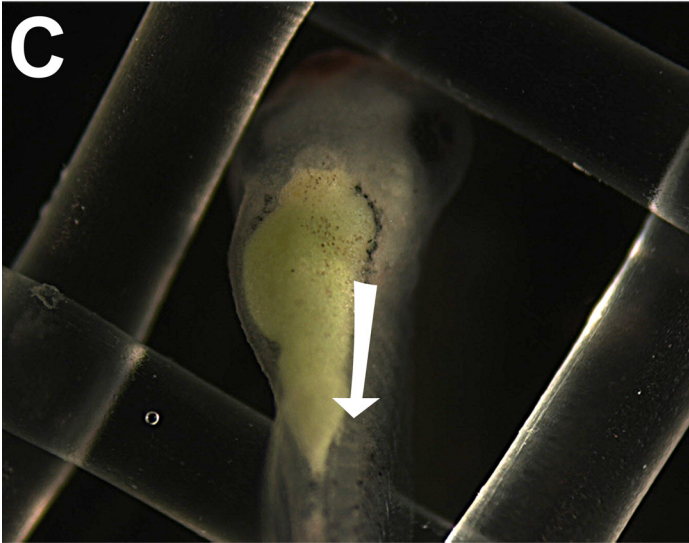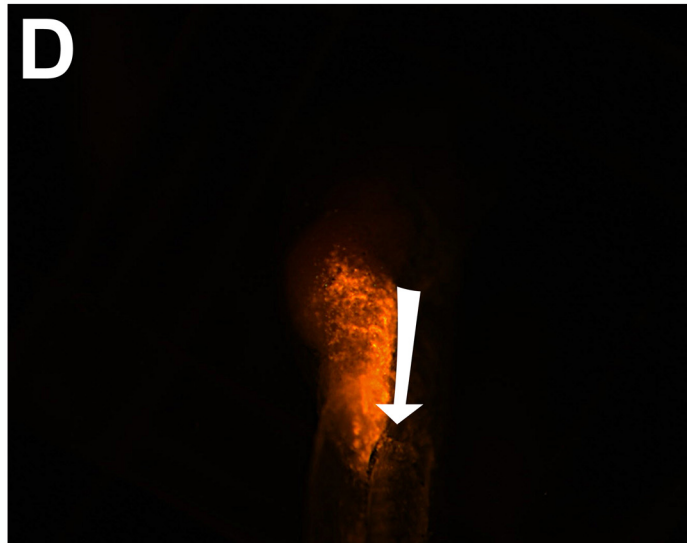

Supplement: supp_dev.072165_DEV072165FigS5.pdf [file supp_dev.072165_DEV072165FigS5.pdf]
